# Supplementary material for: A stable triplet diradical emitter
Source: Royal Society of Chemistry journal article supplement (doi:10.1039/d1sc04486a), 2021-01-01
Supplement: d1sc04486a1.pdf [file d1sc04486a1.pdf]

## A stable triplet diradical emitter

Zhongtao Feng,<sup>‡a</sup> Yuanyuan Chong,<sup>‡b</sup> Shuxuan Tang,<sup>a</sup> Yong Fang,<sup>a</sup> Yue Zhao,<sup>a</sup> Jun Jiang<sup>\*b</sup> and Xiping Wang<sup>\*a</sup>

<sup>a</sup>State Key Laboratory of Coordination Chemistry, School of Chemistry and Chemical Engineering, Collaborative Innovation Center of Advanced Microstructures, Nanjing University, Nanjing 210023, China

<sup>b</sup>Hefei National Laboratory for Physical Sciences at the Microscale, CAS Center for Excellence in Nanoscience, School of Chemistry and Materials Science, University of Science and Technology of China, Hefei, Anhui 230026, China

<sup>‡</sup> These two authors contributed equally to this work.

E-mail: xpwang@nju.edu.cn; jiangjl@ustc.edu.cn

## Content

|                                                                                                                                        |     |
|----------------------------------------------------------------------------------------------------------------------------------------|-----|
| General Procedures .....                                                                                                               | S2  |
| Preparation of <b>3</b> .....                                                                                                          | S3  |
| Preparation of <b>4</b> .....                                                                                                          | S3  |
| <b>Table S1.</b> Crystal data and structure refinement for compounds <b>3</b> and <b>4</b> .....                                       | S4  |
| <b>Table S2.</b> Selected bond lengths (Å) of <b>1</b> , <b>2</b> , <b>3</b> and <b>4</b> .....                                        | S5  |
| <b>Table S3.</b> Selected bond angles (°) of <b>1</b> , <b>2</b> , <b>3</b> and <b>4</b> .....                                         | S6  |
| EPR spectra.....                                                                                                                       | S7  |
| <b>Figure S1.</b> Powder EPR spectrum of <b>4</b> at 90K with the forbidden transition at the half magnetic field.. .....              | S7  |
| <b>Figure S2.</b> Absorption spectra of <b>3</b> in THF before and after irradiation at 365 nm for 0, 10, 20, 30, 40, 50, 60 min ..... | S8  |
| <b>Figure S3.</b> Absorption spectra of <b>4</b> in THF before and after irradiation at 365 nm for 0, 10, 20, 30, 40, 50, 60 min ..... | S8  |
| Computational Details. ....                                                                                                            | S9  |
| <b>Table S4.</b> Energy correction of <b>3</b> .....                                                                                   | S9  |
| <b>Table S5.</b> Energy correction of <b>4</b> .....                                                                                   | S9  |
| <b>Table S6.</b> The UV-vis absorption information for diradical <b>3</b> according to experiment and TDDFT calculation. ....          | S10 |
| <b>Table S7.</b> The UV-vis absorption information for diradical <b>4</b> according to experiment and TDDFT calculation. ....          | S11 |
| Coordinates of the studied molecules .....                                                                                             | S12 |
| <b>3-CS</b> .....                                                                                                                      | S12 |
| <b>3-OS</b> .....                                                                                                                      | S14 |
| <b>3-T</b> .....                                                                                                                       | S16 |
| <b>4-CS</b> .....                                                                                                                      | S19 |
| <b>4-OS</b> .....                                                                                                                      | S21 |
| <b>4-T</b> .....                                                                                                                       | S22 |
| Reference .....                                                                                                                        | S24 |

## General Procedures

All experiments and manipulations were carried out under N<sub>2</sub> atmosphere using standard Schlenk techniques or in a N<sub>2</sub>-filled glovebox. Solvents were dried by the proper drying agents; NaK/benzophenone (tetrahydrofuran, toluene, and n-hexane), and degassed before use. 2,7-di-tert-butylpyrene-4,5,9,10-tetraone,<sup>1</sup> 2,7-dibromopyrene-4,5,9,10-tetraone,<sup>2</sup> chlorobis(perfluorophenyl)borane<sup>3</sup> were synthesized according to published procedures. UV/Vis spectra were recorded on the Lambda 750 spectrometer at room temperature. Fluorescence data were measured at room temperature with a HORIBA Fluorolog-3 spectrofluorometer with a 1 cm quartz cuvette. Cyclic voltammetry was performed on a CHI660E electrochemical workstation with platinum as the working and counter electrode, and a Ag/AgNO<sub>3</sub> electrode as reference. Freshly distilled THF was used as the solvent and n-Bu<sub>4</sub>NPF<sub>6</sub> (10<sup>-1</sup> M) was used as electrolyte. EPR spectra were obtained using Bruker EMX-10/12 variable-temperature apparatus. Magnetic measurements were performed using a Quantum Design SQUID VSM magnetometer with a field of 0.1 T. Element analyses were performed on an Elementar Vario EL III instrument at Shanghai Institute of Organic Chemistry, the Chinese Academy of Science. For the single crystal X-ray structure analyses, the crystals were each mounted on a glass capillary in perfluorinated oil and measured in a cold N<sub>2</sub> flow. The data were collected on Bruker D8 CMOS detectors at 193 K. The structures were solved by direct methods and all refined on F<sup>2</sup> with the SHELX-2014/7 software package.

### Preparation of **3**

30 ml THF was added to a mixture of 2,7-di-tert-butylpyrene-4,5,9,10-tetraone (0.5 mmol, 187 mg), chlorobis(perfluorophenyl)borane (1 mmol, 380 mg) and potassium (1 mmol, 39 mg) at room temperature. After addition, the mixture was stirred for 48 h. All the volatiles were evaporated under vacuum, and the remaining solid was extracted with toluene and filtered through Celite. The filtrate was concentrated and kept at room temperature for 48 h to afford **3** as dark red crystalline solid. Yield: 128 mg, 0.12 mmol, 24%. Elemental analysis for  $C_{48}H_{22}B_2F_{20}O_4 \cdot (C_7H_8)$ : Calcd: C 57.12, H 2.61; Found: C 57.78, H 3.08.

### Preparation of **4**

30 ml THF was added to a mixture of 2,7-dibromopyrene-4,5,9,10-tetraone (0.5 mmol, 210 mg), chlorobis(perfluorophenyl)borane (1 mmol, 380 mg) and potassium (1 mmol, 39 mg) at room temperature. After addition, the mixture was stirred for 48 h. All the volatiles were evaporated under vacuum, and the remaining solid was extracted with toluene and filtered through Celite. The filtrate was concentrated and kept at room temperature for 48 h to afford **4** as dark red crystalline solid. Yield: 140 mg, 0.13 mmol, 25%. Elemental analysis for  $C_{40}H_4B_2Br_2F_{20}O_4 \cdot (2C_7H_8)$ : Calcd: C 50.12, H 1.56; Found: C 50.14, H 1.50.

**Table S1.** Crystal data and structure refinement for compounds **3** and **4**

|                                             | <b>3</b>                                                                      | <b>4</b>                                                                                     |
|---------------------------------------------|-------------------------------------------------------------------------------|----------------------------------------------------------------------------------------------|
| Formula                                     | C <sub>62</sub> H <sub>38</sub> B <sub>2</sub> F <sub>20</sub> O <sub>4</sub> | C <sub>40</sub> H <sub>4</sub> B <sub>2</sub> Br <sub>2</sub> F <sub>20</sub> O <sub>4</sub> |
| Formula weight                              | 1248.54                                                                       | 1109.87                                                                                      |
| Temp. (K)                                   | 193(2)                                                                        | 193(2)                                                                                       |
| Crystal system                              | triclinic                                                                     | triclinic                                                                                    |
| Space group                                 | <i>P</i> -1                                                                   | <i>P</i> -1                                                                                  |
| <i>a</i> (Å)                                | 9.6004(6)                                                                     | 9.4968(4)                                                                                    |
| <i>b</i> (Å)                                | 12.4461(7)                                                                    | 12.6034(7)                                                                                   |
| <i>c</i> (Å)                                | 12.6370(7)                                                                    | 12.6524(6)                                                                                   |
| $\alpha$ (°)                                | 74.158(3)                                                                     | 65.579(2)                                                                                    |
| $\beta$ (°)                                 | 81.407(4)                                                                     | 79.789(2)                                                                                    |
| $\gamma$ (°)                                | 71.642(3)                                                                     | 78.572(2)                                                                                    |
| <i>V</i> [Å <sup>3</sup> ]                  | 1375.35(14)                                                                   | 1343.83(12)                                                                                  |
| <i>Z</i>                                    | 1                                                                             | 1                                                                                            |
| $\rho_{\text{calcd}}$ (g·cm <sup>-3</sup> ) | 1.507                                                                         | 1.371                                                                                        |
| $\mu$ (mm <sup>-1</sup> )                   | 0.784                                                                         | 1.610                                                                                        |
| <i>F</i> (000)                              | 632.0                                                                         | 536.0                                                                                        |
| Collected data                              | 5001                                                                          | 6119                                                                                         |
| Unique data                                 | 3398                                                                          | 4366                                                                                         |
| GOF on <i>F</i> <sup>2</sup>                | 1.053                                                                         | 1.040                                                                                        |
| Final <i>R</i> indexes                      | <i>RI</i> = 0.0474                                                            | <i>RI</i> = 0.0395                                                                           |
| [ <i>I</i> > 2 $\sigma$ ( <i>I</i> )]       | $\omega R2$ = 0.1226                                                          | $\omega R2$ = 0.0957                                                                         |
| <i>R</i> indexes (all data)                 | <i>RI</i> = 0.0768                                                            | <i>RI</i> = 0.0595                                                                           |
|                                             | $\omega R2$ = 0.1391                                                          | $\omega R2$ = 0.1035                                                                         |
| Completeness                                | 0.991                                                                         | 0.990                                                                                        |

**Table S2.** Selected bond lengths (Å) of **1**, **2**, **3** and **4**

Crystallographic data (excluding structure factors) have been deposited with the Cambridge Crystallographic Data Center as supplementary publication CCDC- 2079823 for **3**, and CCDC- 2079824 for **4**.

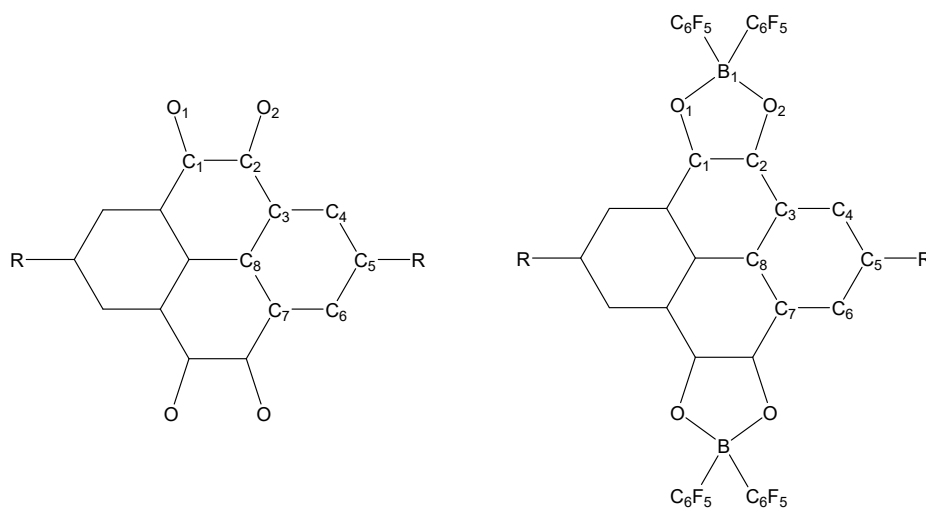

|       | <b>1</b> <sup>1</sup> | <b>2</b> <sup>2</sup> | <b>3</b> | <b>4</b> |
|-------|-----------------------|-----------------------|----------|----------|
| B1-O1 | -                     | -                     | 1.542(3) | 1.542(3) |
| B1-O2 | -                     | -                     | 1.540(3) | 1.535(3) |
| C1-O1 | 1.207(8)              | 1.212(3)              | 1.304(2) | 1.300(2) |
| C2-O2 | 1.221(7)              | 1.207(4)              | 1.305(3) | 1.302(3) |
| C1-C2 | 1.546(1)              | 1.537(4)              | 1.411(3) | 1.399(3) |
| C2-C3 | 1.473(9)              | 1.496(3)              | 1.431(3) | 1.425(3) |
| C3-C4 | 1.384(1)              | 1.397(4)              | 1.392(3) | 1.400(3) |
| C3-C8 | 1.401(8)              | 1.396(3)              | 1.418(3) | 1.417(3) |
| C4-C5 | 1.396(9)              | 1.391(3)              | 1.400(3) | 1.385(3) |
| C5-C6 | 1.384(7)              | 1.376(4)              | 1.392(3) | 1.382(3) |
| C6-C7 | 1.390(1)              | 1.399(4)              | 1.396(3) | 1.394(3) |
| C7-C8 | 1.416(9)              | 1.417(3)              | 1.418(3) | 1.416(3) |

**Table S3.** Selected bond angles ( $^{\circ}$ ) of **1**, **2**, **3** and **4**

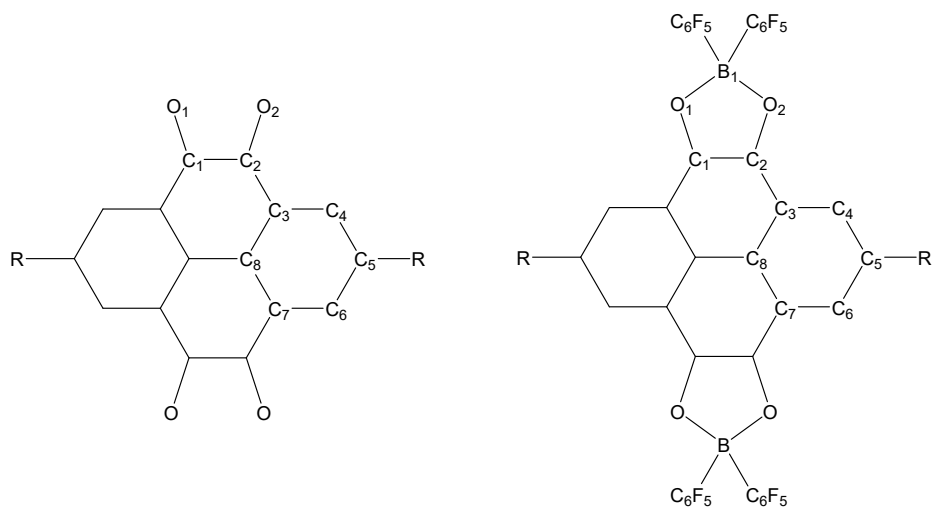

|           | <b>1</b> <sup>1</sup> | <b>2</b> <sup>2</sup> | <b>3</b>   | <b>4</b>   |
|-----------|-----------------------|-----------------------|------------|------------|
| O1-B1-O2  | -                     | -                     | 100.81(16) | 100.90(16) |
| B1-O1-C1  | -                     | -                     | 107.90(16) | 107.43(17) |
| B1-O2-C2  | -                     | -                     | 107.91(17) | 107.69(18) |
| O1-C1-C2  | 119.66(19)            | 119.88(15)            | 111.72(19) | 112.08(19) |
| O2-C2-C1  | 118.26(17)            | 118.36(15)            | 111.65(17) | 111.89(18) |
| O1-B1-C13 | -                     | -                     | 108.74(18) | 109.5(2)   |
| O2-B1-C19 | -                     | -                     | 110.64(18) | 110.09(19) |

## EPR spectra

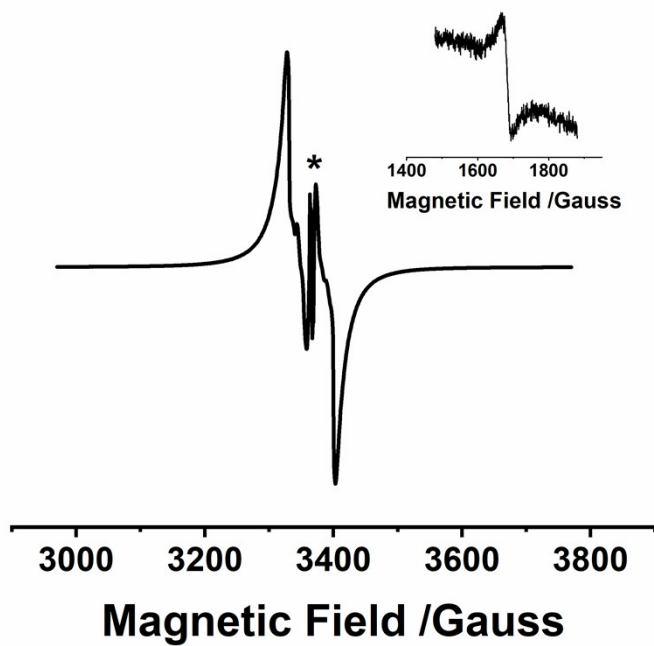

**Figure S1.** Powder EPR spectrum of 4 at 90K with the forbidden transition at the half magnetic field. The star (\*) show the signal derived from monoradical impurities.



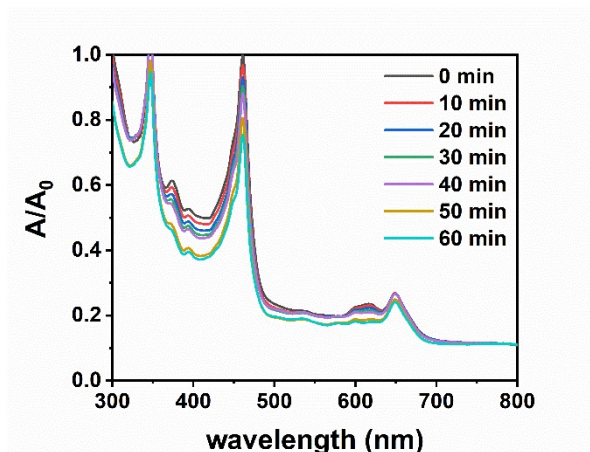

**Figure S2.** Absorption spectra of **3** in THF before and after irradiation at 365 nm for 0, 10, 20, 30, 40, 50, 60 min

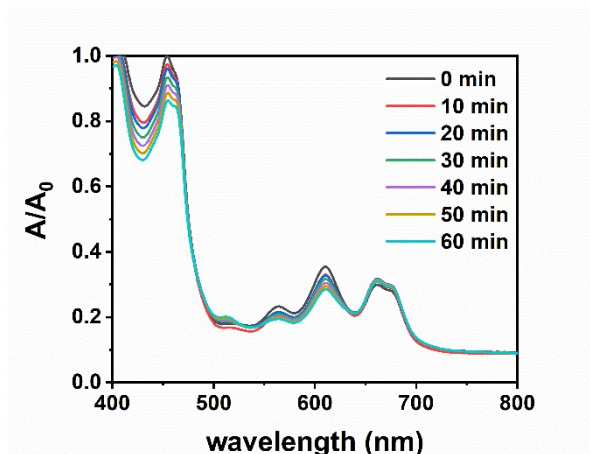

**Figure S3.** Absorption spectra of **4** in THF before and after irradiation at 365 nm for 0, 10, 20, 30, 40, 50, 60 min

## Computational Details.

All the geometry optimizations were performed with the (U)B3LYP functional. Frequency calculations were carried out to confirm that all optimized geometries correspond to energy minima. All calculations were performed with the Gaussian 09 program suite.

**Table S4. Energy correction of 3**

| 3  | Energy/a.u.  | $\langle S^2 \rangle$ | $\Delta E_{x-OS}/ \text{kcal}\cdot\text{mol}^{-1}$ (X = CS, OS, T) |
|----|--------------|-----------------------|--------------------------------------------------------------------|
| CS | -4189.138122 |                       | 5.800058166                                                        |
| OS | -4189.147349 | 0.8969                | 0                                                                  |
| T  | -4189.147329 | 2.0199                | 0.022573596                                                        |

**Table S5. Energy correction of 4**

| 4  | Energy/a.u.  | $\langle S^2 \rangle$ | $\Delta E_{x-OS}/ \text{kcal}\cdot\text{mol}^{-1}$ (X = CS, OS, T) |
|----|--------------|-----------------------|--------------------------------------------------------------------|
| CS | -9017.067231 |                       | 6.751622135                                                        |
| OS | -9017.078522 | 0.938                 | 0                                                                  |
| T  | -9017.079135 | 2.0196                | -0.718256904                                                       |

**Table S6.** The UV-vis absorption information for diradical **3** according to experiment and TDDFT calculation. The orbital contributions are shown with transition percent. The corresponding orbitals (“a” means spin up, “b” means spin down) are displayed in Figure 8A

| Experimental Absorption (nm) | Calculated Absorption (nm) | Oscillator strength ( <i>f</i> ) | Transition Configuration                                                     |
|------------------------------|----------------------------|----------------------------------|------------------------------------------------------------------------------|
| 347                          | 376                        | 0.11                             | 255a -> 267a 46%<br>255b -> 267b 46%                                         |
| 461                          | 427                        | 0.14                             | 256a -> 267a 25%<br>256b -> 267b 25%<br>266a -> 268a 19%<br>266b -> 268b 19% |
| 618                          | -                          | -                                | -                                                                            |
| 649                          | 684                        | 0.01                             | 261a -> 267a 49%<br>261b -> 267b 49%                                         |

**Table S7.** The UV-vis absorption information for diradical **4** according to experiment and TDDFT calculation. The orbital contributions are shown with transition percent. The corresponding orbitals (“a” means spin up, “b” means spin down) are displayed in Figure 8B

| Experimental Absorption (nm) | Calculated Absorption (nm) | Oscillator strength ( <i>f</i> ) | Transition Configuration             |
|------------------------------|----------------------------|----------------------------------|--------------------------------------|
| 359                          | 378                        | 0.003                            | 265a -> 270a 49%<br>265b -> 270b 49% |
| 454                          | 474                        | 0.031                            | 258a -> 269a 49%<br>258b -> 269b 49% |
| 612                          | -                          | -                                | -                                    |
| 663                          | -                          | -                                | -                                    |

## Coordinates of the studied molecules

### 3-CS

| Center<br>Number | Atomic<br>Number | Atomic<br>Type | Coordinates (Angstroms) |           |           |
|------------------|------------------|----------------|-------------------------|-----------|-----------|
|                  |                  |                | X                       | Y         | Z         |
| 1                | 5                | 0              | 4.641390                | -0.085293 | 0.026085  |
| 2                | 6                | 0              | 2.436162                | -0.061085 | -0.696677 |
| 3                | 6                | 0              | 2.432191                | -0.074716 | 0.732532  |
| 4                | 6                | 0              | 1.219078                | -0.050293 | 1.464299  |
| 5                | 6                | 0              | 1.190086                | -0.065191 | 2.876108  |
| 6                | 1                | 0              | 2.145294                | -0.093700 | 3.388038  |
| 7                | 6                | 0              | -0.004551               | -0.043656 | 3.603486  |
| 8                | 6                | 0              | -1.199704               | -0.002476 | 2.865255  |
| 9                | 1                | 0              | -2.156920               | 0.013827  | 3.377775  |
| 10               | 6                | 0              | -1.224294               | 0.016876  | 1.459438  |
| 11               | 6                | 0              | -0.000133               | -0.008457 | 0.717253  |
| 12               | 6                | 0              | -0.052081               | -0.062255 | 5.141533  |
| 13               | 6                | 0              | 1.356027                | -0.119295 | 5.762922  |
| 14               | 1                | 0              | 1.900524                | -1.022803 | 5.465251  |
| 15               | 1                | 0              | 1.271065                | -0.133096 | 6.854373  |
| 16               | 1                | 0              | 1.961669                | 0.753442  | 5.493045  |
| 17               | 6                | 0              | -0.845200               | -1.305543 | 5.611057  |
| 18               | 1                | 0              | -1.874179               | -1.305367 | 5.235531  |
| 19               | 1                | 0              | -0.894561               | -1.326659 | 6.705528  |
| 20               | 1                | 0              | -0.364309               | -2.231298 | 5.275779  |
| 21               | 6                | 0              | -0.756902               | 1.220850  | 5.643508  |
| 22               | 1                | 0              | -0.211565               | 2.118913  | 5.332443  |
| 23               | 1                | 0              | -0.806859               | 1.217012  | 6.738203  |
| 24               | 1                | 0              | -1.782363               | 1.301971  | 5.267275  |
| 25               | 6                | 0              | 5.447651                | 1.318531  | 0.023498  |
| 26               | 6                | 0              | 5.771953                | 2.009432  | 1.191677  |
| 27               | 6                | 0              | 6.458974                | 3.221791  | 1.191402  |
| 28               | 6                | 0              | 6.859158                | 3.780294  | -0.018471 |
| 29               | 6                | 0              | 6.575027                | 3.115152  | -1.207769 |
| 30               | 6                | 0              | 5.886351                | 1.906046  | -1.164350 |
| 31               | 6                | 0              | 5.510728                | -1.454134 | 0.016686  |
| 32               | 6                | 0              | 6.906217                | -1.519872 | 0.036802  |
| 33               | 6                | 0              | 7.611096                | -2.724060 | 0.028919  |
| 34               | 6                | 0              | 6.915224                | -3.927510 | -0.000003 |

|    |   |   |           |           |           |
|----|---|---|-----------|-----------|-----------|
| 35 | 6 | 0 | 5.522837  | -3.913713 | -0.019939 |
| 36 | 6 | 0 | 4.860603  | -2.691492 | -0.010983 |
| 37 | 9 | 0 | 5.436709  | 1.508315  | 2.397138  |
| 38 | 9 | 0 | 6.738119  | 3.850174  | 2.342106  |
| 39 | 9 | 0 | 7.517056  | 4.944263  | -0.038663 |
| 40 | 9 | 0 | 6.966241  | 3.640197  | -2.377276 |
| 41 | 9 | 0 | 5.664128  | 1.292458  | -2.344102 |
| 42 | 9 | 0 | 7.654550  | -0.402158 | 0.067451  |
| 43 | 9 | 0 | 8.949953  | -2.729329 | 0.049320  |
| 44 | 9 | 0 | 7.575132  | -5.089193 | -0.007825 |
| 45 | 9 | 0 | 4.841739  | -5.067441 | -0.046979 |
| 46 | 9 | 0 | 3.507932  | -2.738779 | -0.029525 |
| 47 | 8 | 0 | 3.652065  | -0.089738 | -1.166150 |
| 48 | 8 | 0 | 3.648741  | -0.111442 | 1.206105  |
| 49 | 5 | 0 | -4.641108 | 0.084710  | 0.002083  |
| 50 | 6 | 0 | -2.435703 | 0.058296  | 0.720238  |
| 51 | 6 | 0 | -2.432174 | 0.075448  | -0.708922 |
| 52 | 6 | 0 | -1.218828 | 0.050815  | -1.440609 |
| 53 | 6 | 0 | -1.189771 | 0.066939  | -2.852360 |
| 54 | 1 | 0 | -2.144872 | 0.098808  | -3.364316 |
| 55 | 6 | 0 | 0.004779  | 0.042675  | -3.579793 |
| 56 | 6 | 0 | 1.199837  | -0.001365 | -2.841573 |
| 57 | 1 | 0 | 2.156929  | -0.020895 | -3.354243 |
| 58 | 6 | 0 | 1.224501  | -0.019627 | -1.435789 |
| 59 | 6 | 0 | 0.000359  | 0.007299  | -0.693599 |
| 60 | 6 | 0 | 0.052332  | 0.061321  | -5.117850 |
| 61 | 6 | 0 | -1.355580 | 0.122768  | -5.739237 |
| 62 | 1 | 0 | -1.897453 | 1.027721  | -5.441195 |
| 63 | 1 | 0 | -1.270621 | 0.136693  | -6.830685 |
| 64 | 1 | 0 | -1.963772 | -0.748302 | -5.469706 |
| 65 | 6 | 0 | 0.849211  | 1.302224  | -5.587337 |
| 66 | 1 | 0 | 1.878322  | 1.298596  | -5.212158 |
| 67 | 1 | 0 | 0.898360  | 1.323433  | -6.681811 |
| 68 | 1 | 0 | 0.371331  | 2.229420  | -5.251721 |
| 69 | 6 | 0 | 0.753306  | -1.223835 | -5.619981 |
| 70 | 1 | 0 | 0.205270  | -2.120295 | -5.309022 |
| 71 | 1 | 0 | 0.803264  | -1.220025 | -6.714679 |
| 72 | 1 | 0 | 1.778502  | -1.308133 | -5.243742 |
| 73 | 6 | 0 | -5.447967 | -1.318483 | -0.027644 |
| 74 | 6 | 0 | -5.881353 | -1.885508 | -1.227365 |
| 75 | 6 | 0 | -6.571071 | -3.093016 | -1.294156 |
| 76 | 6 | 0 | -6.861514 | -3.777827 | -0.117627 |
| 77 | 6 | 0 | -6.466495 | -3.240246 | 1.103367  |
| 78 | 6 | 0 | -5.778519 | -2.028726 | 1.127081  |

|    |   |   |           |           |           |
|----|---|---|-----------|-----------|-----------|
| 79 | 6 | 0 | -5.510019 | 1.453728  | 0.022916  |
| 80 | 6 | 0 | -6.905556 | 1.519537  | 0.039207  |
| 81 | 6 | 0 | -7.610049 | 2.723865  | 0.055561  |
| 82 | 6 | 0 | -6.913716 | 3.927394  | 0.056516  |
| 83 | 6 | 0 | -5.521264 | 3.913514  | 0.041860  |
| 84 | 6 | 0 | -4.859426 | 2.691151  | 0.025836  |
| 85 | 9 | 0 | -5.653066 | -1.252560 | -2.395426 |
| 86 | 9 | 0 | -6.957466 | -3.597878 | -2.474085 |
| 87 | 9 | 0 | -7.520488 | -4.940570 | -0.160564 |
| 88 | 9 | 0 | -6.751404 | -3.887640 | 2.242076  |
| 89 | 9 | 0 | -5.448276 | -1.548299 | 2.342569  |
| 90 | 9 | 0 | -7.654345 | 0.401710  | 0.041347  |
| 91 | 9 | 0 | -8.948976 | 2.729179  | 0.070621  |
| 92 | 9 | 0 | -7.573246 | 5.089211  | 0.072258  |
| 93 | 9 | 0 | -4.839735 | 5.067303  | 0.043852  |
| 94 | 9 | 0 | -3.506678 | 2.738338  | 0.014135  |
| 95 | 8 | 0 | -3.651871 | 0.084972  | 1.189950  |
| 96 | 8 | 0 | -3.648471 | 0.114527  | -1.182177 |

### 3-OS

| Center<br>Number | Atomic<br>Number | Atomic<br>Type | Coordinates (Angstroms) |           |           |
|------------------|------------------|----------------|-------------------------|-----------|-----------|
|                  |                  |                | X                       | Y         | Z         |
| 1                | 5                | 0              | -4.633949               | 0.086752  | 0.021995  |
| 2                | 6                | 0              | -2.429146               | 0.060215  | -0.694720 |
| 3                | 6                | 0              | -2.426108               | 0.077334  | 0.726132  |
| 4                | 6                | 0              | -1.211563               | 0.054556  | 1.476623  |
| 5                | 6                | 0              | -1.193183               | 0.073521  | 2.883773  |
| 6                | 1                | 0              | -2.149697               | 0.103512  | 3.391747  |
| 7                | 6                | 0              | 0.002478                | 0.053870  | 3.610389  |
| 8                | 6                | 0              | 1.199256                | 0.010619  | 2.876752  |
| 9                | 1                | 0              | 2.156751                | -0.004230 | 3.387338  |
| 10               | 6                | 0              | 1.216310                | -0.012485 | 1.474366  |
| 11               | 6                | 0              | 0.000137                | 0.010683  | 0.731735  |
| 12               | 6                | 0              | 0.046009                | 0.076638  | 5.148112  |
| 13               | 6                | 0              | -1.362626               | 0.136248  | 5.768208  |
| 14               | 1                | 0              | -1.906019               | 1.039142  | 5.466999  |
| 15               | 1                | 0              | -1.278807               | 0.152941  | 6.859809  |
| 16               | 1                | 0              | -1.968373               | -0.736693 | 5.499571  |
| 17               | 6                | 0              | 0.839219                | 1.320513  | 5.616142  |

|    |   |   |           |           |           |
|----|---|---|-----------|-----------|-----------|
| 18 | 1 | 0 | 1.869006  | 1.317578  | 5.243425  |
| 19 | 1 | 0 | 0.884472  | 1.345383  | 6.710805  |
| 20 | 1 | 0 | 0.360416  | 2.245538  | 5.275841  |
| 21 | 6 | 0 | 0.749215  | -1.205503 | 5.655034  |
| 22 | 1 | 0 | 0.204566  | -2.103963 | 5.343842  |
| 23 | 1 | 0 | 0.795230  | -1.199457 | 6.749988  |
| 24 | 1 | 0 | 1.775406  | -1.287247 | 5.281515  |
| 25 | 6 | 0 | -5.429258 | -1.321392 | 0.023552  |
| 26 | 6 | 0 | -5.750955 | -2.009846 | 1.194066  |
| 27 | 6 | 0 | -6.433970 | -3.224391 | 1.196788  |
| 28 | 6 | 0 | -6.832084 | -3.787392 | -0.011754 |
| 29 | 6 | 0 | -6.550367 | -3.124647 | -1.203036 |
| 30 | 6 | 0 | -5.865704 | -1.913192 | -1.163200 |
| 31 | 6 | 0 | -5.504911 | 1.451881  | 0.011017  |
| 32 | 6 | 0 | -6.900854 | 1.511090  | 0.031610  |
| 33 | 6 | 0 | -7.610596 | 2.712327  | 0.021986  |
| 34 | 6 | 0 | -6.919724 | 3.918664  | -0.009134 |
| 35 | 6 | 0 | -5.527229 | 3.911009  | -0.029587 |
| 36 | 6 | 0 | -4.859549 | 2.691826  | -0.018926 |
| 37 | 9 | 0 | -5.417471 | -1.503707 | 2.397495  |
| 38 | 9 | 0 | -6.711084 | -3.850384 | 2.348893  |
| 39 | 9 | 0 | -7.486044 | -4.953239 | -0.028742 |
| 40 | 9 | 0 | -6.939927 | -3.653935 | -2.370780 |
| 41 | 9 | 0 | -5.645866 | -1.301346 | -2.343828 |
| 42 | 9 | 0 | -7.643805 | 0.390211  | 0.064280  |
| 43 | 9 | 0 | -8.949192 | 2.711718  | 0.042816  |
| 44 | 9 | 0 | -7.584461 | 5.077206  | -0.018607 |
| 45 | 9 | 0 | -4.851264 | 5.067264  | -0.058685 |
| 46 | 9 | 0 | -3.507528 | 2.743889  | -0.037990 |
| 47 | 8 | 0 | -3.642607 | 0.091071  | -1.169612 |
| 48 | 8 | 0 | -3.639185 | 0.117941  | 1.204049  |
| 49 | 5 | 0 | 4.633697  | -0.086115 | 0.007657  |
| 50 | 6 | 0 | 2.428728  | -0.057013 | 0.719497  |
| 51 | 6 | 0 | 2.426116  | -0.078509 | -0.701294 |
| 52 | 6 | 0 | 1.211327  | -0.055361 | -1.451673 |
| 53 | 6 | 0 | 1.192877  | -0.075571 | -2.858779 |
| 54 | 1 | 0 | 2.149274  | -0.109261 | -3.366772 |
| 55 | 6 | 0 | -0.002687 | -0.052856 | -3.585467 |
| 56 | 6 | 0 | -1.199352 | -0.006431 | -2.851842 |
| 57 | 1 | 0 | -2.156721 | 0.011974  | -3.362586 |
| 58 | 6 | 0 | -1.216471 | 0.015516  | -1.449465 |
| 59 | 6 | 0 | -0.000333 | -0.009536 | -0.706840 |
| 60 | 6 | 0 | -0.046254 | -0.075629 | -5.123200 |
| 61 | 6 | 0 | 1.362168  | -0.139936 | -5.743286 |



|    |   |   |           |           |           |
|----|---|---|-----------|-----------|-----------|
| 62 | 1 | 0 | 1.902755  | -1.044378 | -5.441708 |
| 63 | 1 | 0 | 1.278347  | -0.156735 | -6.834883 |
| 64 | 1 | 0 | 1.970639  | 0.731215  | -5.474993 |
| 65 | 6 | 0 | -0.843494 | -1.316934 | -5.591228 |
| 66 | 1 | 0 | -1.873409 | -1.310320 | -5.218879 |
| 67 | 1 | 0 | -0.888538 | -1.341874 | -6.685891 |
| 68 | 1 | 0 | -0.367907 | -2.243506 | -5.250608 |
| 69 | 6 | 0 | -0.745341 | 1.208724  | -5.630233 |
| 70 | 1 | 0 | -0.197802 | 2.105458  | -5.319122 |
| 71 | 1 | 0 | -0.791369 | 1.202737  | -6.725189 |
| 72 | 1 | 0 | -1.771248 | 1.293857  | -5.256704 |
| 73 | 6 | 0 | 5.429431  | 1.321331  | -0.029232 |
| 74 | 6 | 0 | 5.866640  | 1.878875  | -1.232204 |
| 75 | 6 | 0 | 6.552451  | 3.088063  | -1.306130 |
| 76 | 6 | 0 | 6.834262  | 3.784249  | -0.134094 |
| 77 | 6 | 0 | 6.434970  | 3.256369  | 1.089782  |
| 78 | 6 | 0 | 5.751031  | 2.042744  | 1.121283  |
| 79 | 6 | 0 | 5.504335  | -1.451314 | 0.031632  |
| 80 | 6 | 0 | 6.900300  | -1.510367 | 0.051331  |
| 81 | 6 | 0 | 7.609769  | -2.711645 | 0.070674  |
| 82 | 6 | 0 | 6.918579  | -3.918200 | 0.071318  |
| 83 | 6 | 0 | 5.526050  | -3.910687 | 0.053464  |
| 84 | 6 | 0 | 4.858648  | -2.691452 | 0.034604  |
| 85 | 9 | 0 | 5.646436  | 1.233856  | -2.394808 |
| 86 | 9 | 0 | 6.943195  | 3.583530  | -2.488209 |
| 87 | 9 | 0 | 7.489347  | 4.948515  | -0.184032 |
| 88 | 9 | 0 | 6.711775  | 3.914806  | 2.223752  |
| 89 | 9 | 0 | 5.416323  | 1.571794  | 2.338742  |
| 90 | 9 | 0 | 7.643565  | -0.389221 | 0.054341  |
| 91 | 9 | 0 | 8.948401  | -2.710851 | 0.089004  |
| 92 | 9 | 0 | 7.583041  | -5.076788 | 0.089918  |
| 93 | 9 | 0 | 4.849790  | -5.067137 | 0.055219  |
| 94 | 9 | 0 | 3.506574  | -2.743645 | 0.020066  |
| 95 | 8 | 0 | 3.642513  | -0.085262 | 1.194616  |
| 96 | 8 | 0 | 3.638875  | -0.122143 | -1.178889 |

-----

### 3-T

-----

| Center<br>Number | Atomic<br>Number | Atomic<br>Type | Coordinates (Angstroms) |   |   |
|------------------|------------------|----------------|-------------------------|---|---|
|                  |                  |                | X                       | Y | Z |

-----

|    |   |   |           |           |           |
|----|---|---|-----------|-----------|-----------|
| 1  | 5 | 0 | -4.628508 | 0.086613  | 0.020383  |
| 2  | 6 | 0 | -2.423426 | 0.058898  | -0.695301 |
| 3  | 6 | 0 | -2.420670 | 0.076532  | 0.724724  |
| 4  | 6 | 0 | -1.208751 | 0.054553  | 1.481955  |
| 5  | 6 | 0 | -1.194375 | 0.074250  | 2.889662  |
| 6  | 1 | 0 | -2.151665 | 0.103820  | 3.395511  |
| 7  | 6 | 0 | 0.001600  | 0.055709  | 3.615462  |
| 8  | 6 | 0 | 1.199272  | 0.013019  | 2.883833  |
| 9  | 1 | 0 | 2.157134  | -0.000922 | 3.393050  |
| 10 | 6 | 0 | 1.213367  | -0.010707 | 1.480462  |
| 11 | 6 | 0 | 0.000220  | 0.011187  | 0.738410  |
| 12 | 6 | 0 | 0.043656  | 0.079103  | 5.153188  |
| 13 | 6 | 0 | -1.365276 | 0.137811  | 5.772752  |
| 14 | 1 | 0 | -1.909172 | 1.040097  | 5.470752  |
| 15 | 1 | 0 | -1.281999 | 0.154955  | 6.864434  |
| 16 | 1 | 0 | -1.970115 | -0.735657 | 5.503916  |
| 17 | 6 | 0 | 0.835499  | 1.323698  | 5.621544  |
| 18 | 1 | 0 | 1.865589  | 1.321087  | 5.249881  |
| 19 | 1 | 0 | 0.879183  | 1.349389  | 6.716298  |
| 20 | 1 | 0 | 0.356491  | 2.248137  | 5.279904  |
| 21 | 6 | 0 | 0.747485  | -1.202232 | 5.661236  |
| 22 | 1 | 0 | 0.204017  | -2.101183 | 5.349357  |
| 23 | 1 | 0 | 0.791990  | -1.196085 | 6.756297  |
| 24 | 1 | 0 | 1.774043  | -1.282955 | 5.288714  |
| 25 | 6 | 0 | -5.423356 | -1.321034 | 0.022918  |
| 26 | 6 | 0 | -5.746915 | -2.007136 | 1.194348  |
| 27 | 6 | 0 | -6.431182 | -3.220937 | 1.198197  |
| 28 | 6 | 0 | -6.828506 | -3.785362 | -0.009985 |
| 29 | 6 | 0 | -6.544872 | -3.124861 | -1.202093 |
| 30 | 6 | 0 | -5.858989 | -1.914065 | -1.163566 |
| 31 | 6 | 0 | -5.496832 | 1.452605  | 0.009412  |
| 32 | 6 | 0 | -6.892789 | 1.513009  | 0.029398  |
| 33 | 6 | 0 | -7.601177 | 2.715021  | 0.019663  |
| 34 | 6 | 0 | -6.908988 | 3.920649  | -0.010931 |
| 35 | 6 | 0 | -5.516462 | 3.911693  | -0.030768 |
| 36 | 6 | 0 | -4.850057 | 2.691858  | -0.020050 |
| 37 | 9 | 0 | -5.414129 | -1.499032 | 2.396998  |
| 38 | 9 | 0 | -6.710257 | -3.844726 | 2.350864  |
| 39 | 9 | 0 | -7.483659 | -4.950413 | -0.025850 |
| 40 | 9 | 0 | -6.933791 | -3.655536 | -2.369272 |
| 41 | 9 | 0 | -5.637214 | -1.304055 | -2.344609 |
| 42 | 9 | 0 | -7.636642 | 0.392862  | 0.061458  |
| 43 | 9 | 0 | -8.939671 | 2.715789  | 0.039856  |
| 44 | 9 | 0 | -7.572505 | 5.079737  | -0.020496 |

|    |   |   |           |           |           |
|----|---|---|-----------|-----------|-----------|
| 45 | 9 | 0 | -4.839361 | 5.067129  | -0.059348 |
| 46 | 9 | 0 | -3.497982 | 2.742160  | -0.038519 |
| 47 | 8 | 0 | -3.635815 | 0.089617  | -1.170366 |
| 48 | 8 | 0 | -3.632351 | 0.117068  | 1.202555  |
| 49 | 5 | 0 | 4.628293  | -0.085943 | 0.009017  |
| 50 | 6 | 0 | 2.423050  | -0.055417 | 0.719863  |
| 51 | 6 | 0 | 2.420694  | -0.077982 | -0.700096 |
| 52 | 6 | 0 | 1.208518  | -0.055537 | -1.457214 |
| 53 | 6 | 0 | 1.194085  | -0.076529 | -2.864871 |
| 54 | 1 | 0 | 2.151256  | -0.109986 | -3.370733 |
| 55 | 6 | 0 | -0.001788 | -0.054730 | -3.590754 |
| 56 | 6 | 0 | -1.199337 | -0.008636 | -2.859133 |
| 57 | 1 | 0 | -2.157073 | 0.009032  | -3.368508 |
| 58 | 6 | 0 | -1.213479 | 0.013918  | -1.455778 |
| 59 | 6 | 0 | -0.000388 | -0.010039 | -0.713735 |
| 60 | 6 | 0 | -0.043888 | -0.078172 | -5.128488 |
| 61 | 6 | 0 | 1.364820  | -0.141942 | -5.748034 |
| 62 | 1 | 0 | 1.905671  | -1.045923 | -5.445666 |
| 63 | 1 | 0 | 1.281544  | -0.159167 | -6.839711 |
| 64 | 1 | 0 | 1.972613  | 0.729578  | -5.479533 |
| 65 | 6 | 0 | -0.840072 | -1.320022 | -5.596792 |
| 66 | 1 | 0 | -1.870284 | -1.313478 | -5.225478 |
| 67 | 1 | 0 | -0.883576 | -1.345802 | -6.691544 |
| 68 | 1 | 0 | -0.364497 | -2.246116 | -5.254822 |
| 69 | 6 | 0 | -0.743289 | 1.205532  | -5.636688 |
| 70 | 1 | 0 | -0.196715 | 2.102640  | -5.324915 |
| 71 | 1 | 0 | -0.787799 | 1.199413  | -6.731750 |
| 72 | 1 | 0 | -1.769550 | 1.289901  | -5.264170 |
| 73 | 6 | 0 | 5.423519  | 1.320983  | -0.029482 |
| 74 | 6 | 0 | 5.861513  | 1.876617  | -1.233099 |
| 75 | 6 | 0 | 6.548538  | 3.085022  | -1.308017 |
| 76 | 6 | 0 | 6.830597  | 3.782141  | -0.136548 |
| 77 | 6 | 0 | 6.430466  | 3.256056  | 1.087860  |
| 78 | 6 | 0 | 5.745301  | 2.043165  | 1.120548  |
| 79 | 6 | 0 | 5.496314  | -1.451976 | 0.033610  |
| 80 | 6 | 0 | 6.892280  | -1.512228 | 0.053420  |
| 81 | 6 | 0 | 7.600389  | -2.714273 | 0.073474  |
| 82 | 6 | 0 | 6.907891  | -3.920110 | 0.074687  |
| 83 | 6 | 0 | 5.515340  | -3.911293 | 0.056698  |
| 84 | 6 | 0 | 4.849220  | -2.691412 | 0.037139  |
| 85 | 9 | 0 | 5.640928  | 1.230255  | -2.394738 |
| 86 | 9 | 0 | 6.940185  | 3.578788  | -2.490364 |
| 87 | 9 | 0 | 7.486841  | 4.945563  | -0.187571 |
| 88 | 9 | 0 | 6.707629  | 3.915339  | 2.221082  |

|    |   |   |          |           |           |
|----|---|---|----------|-----------|-----------|
| 89 | 9 | 0 | 5.409681 | 1.573530  | 2.338089  |
| 90 | 9 | 0 | 7.636437 | -0.391825 | 0.055887  |
| 91 | 9 | 0 | 8.938908 | -2.714858 | 0.091915  |
| 92 | 9 | 0 | 7.571131 | -5.079236 | 0.093942  |
| 93 | 9 | 0 | 4.837946 | -5.066908 | 0.058943  |
| 94 | 9 | 0 | 3.497102 | -2.741845 | 0.022378  |
| 95 | 8 | 0 | 3.635795 | -0.083181 | 1.195136  |
| 96 | 8 | 0 | 3.632020 | -0.121876 | -1.177616 |

---

#### 4-CS

---

| Center<br>Number | Atomic<br>Number | Atomic<br>Type | Coordinates (Angstroms) |           |           |
|------------------|------------------|----------------|-------------------------|-----------|-----------|
|                  |                  |                | X                       | Y         | Z         |
| 1                | 5                | 0              | -4.594037               | 0.013736  | 0.033058  |
| 2                | 35               | 0              | 0.060986                | -4.755294 | 2.644639  |
| 3                | 6                | 0              | -2.394418               | 0.625262  | -0.344764 |
| 4                | 6                | 0              | -2.391518               | -0.615239 | 0.364172  |
| 5                | 6                | 0              | -1.174813               | -1.261709 | 0.708401  |
| 6                | 6                | 0              | -1.155707               | -2.491115 | 1.392921  |
| 7                | 1                | 0              | -2.095780               | -2.961550 | 1.662386  |
| 8                | 6                | 0              | 0.056578                | -3.098079 | 1.716635  |
| 9                | 6                | 0              | 1.266129                | -2.499757 | 1.366826  |
| 10               | 1                | 0              | 2.207921                | -2.974481 | 1.622202  |
| 11               | 6                | 0              | 1.280617                | -1.272518 | 0.678882  |
| 12               | 6                | 0              | 0.051290                | -0.619436 | 0.329392  |
| 13               | 6                | 0              | -5.452539               | 0.656293  | 1.243946  |
| 14               | 6                | 0              | -6.227437               | -0.192754 | 2.037659  |
| 15               | 6                | 0              | -7.023141               | 0.255775  | 3.086761  |
| 16               | 6                | 0              | -7.061929               | 1.619089  | 3.370411  |
| 17               | 6                | 0              | -6.309532               | 2.502955  | 2.603290  |
| 18               | 6                | 0              | -5.522413               | 2.013554  | 1.560951  |
| 19               | 6                | 0              | -5.485747               | -0.621440 | -1.157286 |
| 20               | 6                | 0              | -6.253670               | 0.235714  | -1.948928 |
| 21               | 6                | 0              | -7.075573               | -0.206888 | -2.980240 |
| 22               | 6                | 0              | -7.149964               | -1.572205 | -3.246499 |
| 23               | 6                | 0              | -6.406762               | -2.464078 | -2.479626 |
| 24               | 6                | 0              | -5.592669               | -1.980566 | -1.455483 |
| 25               | 9                | 0              | -6.220747               | -1.517871 | 1.789172  |
| 26               | 9                | 0              | -7.744643               | -0.601530 | 3.819886  |
| 27               | 9                | 0              | -7.816442               | 2.074582  | 4.374732  |

|    |    |   |           |           |           |
|----|----|---|-----------|-----------|-----------|
| 28 | 9  | 0 | -6.343462 | 3.814673  | 2.872969  |
| 29 | 9  | 0 | -4.817444 | 2.925440  | 0.865760  |
| 30 | 9  | 0 | -6.214278 | 1.563075  | -1.715854 |
| 31 | 9  | 0 | -7.788752 | 0.658118  | -3.712571 |
| 32 | 9  | 0 | -7.930069 | -2.022122 | -4.233658 |
| 33 | 9  | 0 | -6.475650 | -3.777847 | -2.731978 |
| 34 | 9  | 0 | -4.899980 | -2.899854 | -0.758105 |
| 35 | 8  | 0 | -3.608693 | 1.035949  | -0.570612 |
| 36 | 8  | 0 | -3.603869 | -1.017519 | 0.614584  |
| 37 | 5  | 0 | 4.703543  | -0.006014 | -0.045479 |
| 38 | 35 | 0 | 0.039062  | 4.754882  | -2.663878 |
| 39 | 6  | 0 | 2.494663  | -0.637165 | 0.306497  |
| 40 | 6  | 0 | 2.491383  | 0.610670  | -0.392469 |
| 41 | 6  | 0 | 1.274725  | 1.256054  | -0.736905 |
| 42 | 6  | 0 | 1.254818  | 2.486103  | -1.419857 |
| 43 | 1  | 0 | 2.194595  | 2.957209  | -1.688997 |
| 44 | 6  | 0 | 0.042549  | 3.093916  | -1.742643 |
| 45 | 6  | 0 | -1.167032 | 2.494085  | -1.396084 |
| 46 | 1  | 0 | -2.109163 | 2.971729  | -1.644871 |
| 47 | 6  | 0 | -1.180621 | 1.263381  | -0.713826 |
| 48 | 6  | 0 | 0.048433  | 0.611424  | -0.362157 |
| 49 | 6  | 0 | 5.563612  | -0.674389 | -1.242590 |
| 50 | 6  | 0 | 6.959329  | -0.707977 | -1.304543 |
| 51 | 6  | 0 | 7.658157  | -1.299603 | -2.357322 |
| 52 | 6  | 0 | 6.957023  | -1.888834 | -3.403832 |
| 53 | 6  | 0 | 5.564309  | -1.880228 | -3.387013 |
| 54 | 6  | 0 | 4.908267  | -1.280166 | -2.318875 |
| 55 | 6  | 0 | 5.504968  | 0.673727  | 1.181320  |
| 56 | 6  | 0 | 5.941481  | -0.076068 | 2.275067  |
| 57 | 6  | 0 | 6.642209  | 0.475475  | 3.344041  |
| 58 | 6  | 0 | 6.938896  | 1.835745  | 3.335145  |
| 59 | 6  | 0 | 6.539492  | 2.618375  | 2.255958  |
| 60 | 6  | 0 | 5.840457  | 2.028217  | 1.205207  |
| 61 | 9  | 0 | 7.711636  | -0.160188 | -0.334130 |
| 62 | 9  | 0 | 8.996277  | -1.303829 | -2.367015 |
| 63 | 9  | 0 | 7.612254  | -2.458287 | -4.418058 |
| 64 | 9  | 0 | 4.877492  | -2.443718 | -4.389017 |
| 65 | 9  | 0 | 3.554274  | -1.300028 | -2.353328 |
| 66 | 9  | 0 | 5.706267  | -1.402127 | 2.321306  |
| 67 | 9  | 0 | 7.033280  | -0.286916 | 4.373498  |
| 68 | 9  | 0 | 7.608361  | 2.384366  | 4.353186  |
| 69 | 9  | 0 | 6.830688  | 3.925636  | 2.234146  |
| 70 | 9  | 0 | 5.504914  | 2.831512  | 0.176693  |
| 71 | 8  | 0 | 3.707325  | -1.053138 | 0.523369  |

72            8            0            3.701991    1.017405    -0.637239

---

#### 4-OS

---

| Center<br>Number | Atomic<br>Number | Atomic<br>Type | Coordinates (Angstroms) |           |           |
|------------------|------------------|----------------|-------------------------|-----------|-----------|
|                  |                  |                | X                       | Y         | Z         |
| 1                | 5                | 0              | 4.583130                | 0.002402  | -0.031777 |
| 2                | 35               | 0              | -0.073646               | -5.135264 | -1.798535 |
| 3                | 6                | 0              | 2.386408                | 0.669283  | 0.236529  |
| 4                | 6                | 0              | 2.380620                | -0.665409 | -0.245099 |
| 5                | 6                | 0              | 1.161578                | -1.374961 | -0.482383 |
| 6                | 6                | 0              | 1.149460                | -2.698390 | -0.950112 |
| 7                | 1                | 0              | 2.089194                | -3.206645 | -1.135847 |
| 8                | 6                | 0              | -0.065585               | -3.345006 | -1.165859 |
| 9                | 6                | 0              | -1.274953               | -2.697317 | -0.922668 |
| 10               | 1                | 0              | -2.218737               | -3.203441 | -1.092860 |
| 11               | 6                | 0              | -1.276751               | -1.375110 | -0.451663 |
| 12               | 6                | 0              | -0.054482               | -0.676770 | -0.218297 |
| 13               | 6                | 0              | 5.436227                | 0.417142  | -1.339153 |
| 14               | 6                | 0              | 6.195992                | -0.566191 | -1.977612 |
| 15               | 6                | 0              | 6.991227                | -0.314177 | -3.090593 |
| 16               | 6                | 0              | 7.045217                | 0.980216  | -3.603074 |
| 17               | 6                | 0              | 6.309235                | 1.992728  | -2.995452 |
| 18               | 6                | 0              | 5.522118                | 1.699822  | -1.881897 |
| 19               | 6                | 0              | 5.471606                | -0.411833 | 1.251678  |
| 20               | 6                | 0              | 6.241514                | 0.573448  | 1.874710  |
| 21               | 6                | 0              | 7.066632                | 0.321503  | 2.965742  |
| 22               | 6                | 0              | 7.141803                | -0.974811 | 3.470645  |
| 23               | 6                | 0              | 6.397052                | -1.989367 | 2.877242  |
| 24               | 6                | 0              | 5.579774                | -1.696503 | 1.785653  |
| 25               | 9                | 0              | 6.175687                | -1.827633 | -1.502777 |
| 26               | 9                | 0              | 7.698236                | -1.293273 | -3.668371 |
| 27               | 9                | 0              | 7.799767                | 1.247235  | -4.672619 |
| 28               | 9                | 0              | 6.358672                | 3.238127  | -3.485324 |
| 29               | 9                | 0              | 4.835626                | 2.725706  | -1.346600 |
| 30               | 9                | 0              | 6.201694                | 1.836652  | 1.405721  |
| 31               | 9                | 0              | 7.782260                | 1.302463  | 3.529628  |
| 32               | 9                | 0              | 7.925257                | -1.241854 | 4.519192  |
| 33               | 9                | 0              | 6.467333                | -3.236693 | 3.359534  |
| 34               | 9                | 0              | 4.887076                | -2.724299 | 1.262399  |

|    |    |   |           |           |           |
|----|----|---|-----------|-----------|-----------|
| 35 | 8  | 0 | 3.599134  | 1.117722  | 0.384991  |
| 36 | 8  | 0 | 3.589413  | -1.113980 | -0.422493 |
| 37 | 5  | 0 | -4.696548 | 0.014941  | 0.055261  |
| 38 | 35 | 0 | -0.030409 | 5.144930  | 1.831665  |
| 39 | 6  | 0 | -2.490262 | -0.667152 | -0.183909 |
| 40 | 6  | 0 | -2.484144 | 0.671067  | 0.290715  |
| 41 | 6  | 0 | -1.265074 | 1.380210  | 0.526879  |
| 42 | 6  | 0 | -1.252230 | 2.704408  | 0.992200  |
| 43 | 1  | 0 | -2.191878 | 3.213062  | 1.177025  |
| 44 | 6  | 0 | -0.037390 | 3.352060  | 1.206454  |
| 45 | 6  | 0 | 1.172265  | 2.703870  | 0.966267  |
| 46 | 1  | 0 | 2.116183  | 3.212086  | 1.129521  |
| 47 | 6  | 0 | 1.173330  | 1.379405  | 0.501311  |
| 48 | 6  | 0 | -0.048645 | 0.681087  | 0.266599  |
| 49 | 6  | 0 | -5.562716 | -0.431871 | 1.344673  |
| 50 | 6  | 0 | -6.958339 | -0.408978 | 1.415312  |
| 51 | 6  | 0 | -7.666890 | -0.803809 | 2.550506  |
| 52 | 6  | 0 | -6.975857 | -1.242877 | 3.674692  |
| 53 | 6  | 0 | -5.583664 | -1.281168 | 3.652966  |
| 54 | 6  | 0 | -4.917223 | -0.878821 | 2.501736  |
| 55 | 6  | 0 | -5.481997 | 0.466318  | -1.280591 |
| 56 | 6  | 0 | -5.959633 | -0.482125 | -2.187366 |
| 57 | 6  | 0 | -6.647181 | -0.145125 | -3.349417 |
| 58 | 6  | 0 | -6.886967 | 1.196943  | -3.633004 |
| 59 | 6  | 0 | -6.445125 | 2.175558  | -2.747851 |
| 60 | 6  | 0 | -5.760759 | 1.797299  | -1.594262 |
| 61 | 9  | 0 | -7.699899 | 0.005547  | 0.373530  |
| 62 | 9  | 0 | -9.004149 | -0.762431 | 2.564860  |
| 63 | 9  | 0 | -7.639860 | -1.623903 | 4.768076  |
| 64 | 9  | 0 | -4.907388 | -1.699989 | 4.729842  |
| 65 | 9  | 0 | -3.564733 | -0.932171 | 2.535770  |
| 66 | 9  | 0 | -5.778042 | -1.794823 | -1.944339 |
| 67 | 9  | 0 | -7.078671 | -1.093841 | -4.190159 |
| 68 | 9  | 0 | -7.542116 | 1.542069  | -4.744956 |
| 69 | 9  | 0 | -6.680752 | 3.467824  | -3.008897 |
| 70 | 9  | 0 | -5.381737 | 2.788959  | -0.765089 |
| 71 | 8  | 0 | -3.700914 | -1.119390 | -0.324065 |
| 72 | 8  | 0 | -3.691535 | 1.120562  | 0.468679  |

---

4-T

---

| Center<br>Number | Atomic<br>Number | Atomic<br>Type | Coordinates (Angstroms) |           |           |
|------------------|------------------|----------------|-------------------------|-----------|-----------|
|                  |                  |                | X                       | Y         | Z         |
| 1                | 5                | 0              | 4.579282                | 0.003519  | -0.032789 |
| 2                | 35               | 0              | -0.068918               | -5.180476 | -1.684331 |
| 3                | 6                | 0              | 2.381779                | 0.675100  | 0.218181  |
| 4                | 6                | 0              | 2.377063                | -0.669981 | -0.232390 |
| 5                | 6                | 0              | 1.161008                | -1.389772 | -0.455228 |
| 6                | 6                | 0              | 1.152617                | -2.724931 | -0.892488 |
| 7                | 1                | 0              | 2.093250                | -3.235407 | -1.065427 |
| 8                | 6                | 0              | -0.062297               | -3.375947 | -1.093038 |
| 9                | 6                | 0              | -1.272505               | -2.724955 | -0.865455 |
| 10               | 1                | 0              | -2.216423               | -3.234108 | -1.023597 |
| 11               | 6                | 0              | -1.272581               | -1.390917 | -0.424912 |
| 12               | 6                | 0              | -0.053230               | -0.687588 | -0.208225 |
| 13               | 6                | 0              | 5.432520                | 0.389489  | -1.348206 |
| 14               | 6                | 0              | 6.192382                | -0.607516 | -1.964993 |
| 15               | 6                | 0              | 6.988636                | -0.379421 | -3.082395 |
| 16               | 6                | 0              | 7.043605                | 0.903853  | -3.622085 |
| 17               | 6                | 0              | 6.307506                | 1.929327  | -3.036697 |
| 18               | 6                | 0              | 5.519276                | 1.660440  | -1.917916 |
| 19               | 6                | 0              | 5.464770                | -0.381715 | 1.261163  |
| 20               | 6                | 0              | 6.233366                | 0.617291  | 1.863658  |
| 21               | 6                | 0              | 7.056366                | 0.389661  | 2.961609  |
| 22               | 6                | 0              | 7.130653                | -0.895175 | 3.495237  |
| 23               | 6                | 0              | 6.387076                | -1.922737 | 2.923075  |
| 24               | 6                | 0              | 5.571852                | -1.654296 | 1.823726  |
| 25               | 9                | 0              | 6.170996                | -1.858490 | -1.463531 |
| 26               | 9                | 0              | 7.695636                | -1.370851 | -3.638562 |
| 27               | 9                | 0              | 7.799135                | 1.147962  | -4.696289 |
| 28               | 9                | 0              | 6.357770                | 3.163975  | -3.552755 |
| 29               | 9                | 0              | 4.832701                | 2.697492  | -1.404987 |
| 30               | 9                | 0              | 6.194090                | 1.869711  | 1.366809  |
| 31               | 9                | 0              | 7.770681                | 1.383000  | 3.504915  |
| 32               | 9                | 0              | 7.912012                | -1.138887 | 4.550888  |
| 33               | 9                | 0              | 6.456303                | -3.158955 | 3.433081  |
| 34               | 9                | 0              | 4.880035                | -2.693305 | 1.322132  |
| 35               | 8                | 0              | 3.593179                | 1.127560  | 0.356912  |
| 36               | 8                | 0              | 3.585254                | -1.121742 | -0.398648 |
| 37               | 5                | 0              | -4.691269               | 0.010609  | 0.052294  |
| 38               | 35               | 0              | -0.033666               | 5.189378  | 1.709204  |
| 39               | 6                | 0              | -2.484105               | -0.673722 | -0.172090 |
| 40               | 6                | 0              | -2.479138               | 0.675043  | 0.270108  |
| 41               | 6                | 0              | -1.263046               | 1.394694  | 0.490854  |



|    |   |   |           |           |           |
|----|---|---|-----------|-----------|-----------|
| 42 | 6 | 0 | -1.253910 | 2.730585  | 0.925739  |
| 43 | 1 | 0 | -2.194464 | 3.241385  | 1.097906  |
| 44 | 6 | 0 | -0.039224 | 3.382432  | 1.125320  |
| 45 | 6 | 0 | 1.171295  | 2.730797  | 0.901452  |
| 46 | 1 | 0 | 2.115324  | 3.241827  | 1.052902  |
| 47 | 6 | 0 | 1.170641  | 1.394666  | 0.466994  |
| 48 | 6 | 0 | -0.048422 | 0.691569  | 0.248089  |
| 49 | 6 | 0 | -5.553612 | -0.406922 | 1.353440  |
| 50 | 6 | 0 | -6.949347 | -0.388881 | 1.424200  |
| 51 | 6 | 0 | -7.655383 | -0.757519 | 2.569710  |
| 52 | 6 | 0 | -6.961642 | -1.163885 | 3.704490  |
| 53 | 6 | 0 | -5.569271 | -1.196326 | 3.682893  |
| 54 | 6 | 0 | -4.905348 | -0.820884 | 2.521217  |
| 55 | 6 | 0 | -5.478857 | 0.432317  | -1.291350 |
| 56 | 6 | 0 | -5.940290 | -0.531378 | -2.190343 |
| 57 | 6 | 0 | -6.631322 | -0.214508 | -3.356165 |
| 58 | 6 | 0 | -6.891739 | 1.121103  | -3.651406 |
| 59 | 6 | 0 | -6.466783 | 2.114175  | -2.773947 |
| 60 | 6 | 0 | -5.778329 | 1.756141  | -1.616577 |
| 61 | 9 | 0 | -7.693262 | -0.005557 | 0.372299  |
| 62 | 9 | 0 | -8.992744 | -0.722230 | 2.583792  |
| 63 | 9 | 0 | -7.623203 | -1.519316 | 4.807826  |
| 64 | 9 | 0 | -4.890545 | -1.583876 | 4.769782  |
| 65 | 9 | 0 | -3.552591 | -0.867346 | 2.555468  |
| 66 | 9 | 0 | -5.739342 | -1.839110 | -1.936631 |
| 67 | 9 | 0 | -7.046831 | -1.176806 | -4.189386 |
| 68 | 9 | 0 | -7.550663 | 1.446287  | -4.767047 |
| 69 | 9 | 0 | -6.722730 | 3.400205  | -3.045917 |
| 70 | 9 | 0 | -5.416545 | 2.759530  | -0.793966 |
| 71 | 8 | 0 | -3.693471 | -1.130315 | -0.300945 |
| 72 | 8 | 0 | -3.685918 | 1.127615  | 0.437348  |

---

### Reference:

1. Z. Wang, V. Enkelmann, F. Negri and K. Müllen, *Angew. Chem. Int. Ed.* 2004, **43**, 1972-1975.
2. S. Kawano, M. Baumgarten, D. Chercka, V. Enkelmann and K. Müllen, *Chem. Commun.* 2013, **49**, 5058-5060.
3. D. Parks, W. Piers and G. Yap, *Organometallics*, 1998, **30**, 5492-5503.
